# Supplementary material
Source: HighWire-hosted journal article supplement (http://ghspjournal.org/highwire/filestream/5942/field_highwire_adjunct_files/2/GHSP-D-21-00661-supplement-3.pdf)
Supplement: GHSP-D-21-00661-supplement-3.pdf [file GHSP-D-21-00661-supplement-3.pdf]

### Supplement 3. Detailed Summary Tables Across the Six Districts

**Table S1: Characteristics of survey respondents across the six districts (unweighted)**

| Characteristics *             | Overall         | Low-risk districts      |                         |                        | High-risk districts       |                          |                          |
|-------------------------------|-----------------|-------------------------|-------------------------|------------------------|---------------------------|--------------------------|--------------------------|
|                               | N=3485<br>n (%) | Busia<br>N=634<br>n (%) | Lamwo<br>N=593<br>n (%) | Arua<br>N=506<br>n (%) | Kampala<br>N=511<br>n (%) | Kisoro<br>N=612<br>n (%) | Kasese<br>N=629<br>n (%) |
| <b>Respondent category</b>    |                 |                         |                         |                        |                           |                          |                          |
| Household head                | 1769 (50.8)     | 318 (50.2)              | 298 (50.3)              | 262 (51.8)             | 262 (51.3)                | 307 (50.2)               | 322 (51.2)               |
| Woman aged ≥25 years          | 1019 (29.2)     | 177 (27.9)              | 169 (28.5)              | 138 (27.3)             | 160 (31.3)                | 177 (28.9)               | 198 (31.5)               |
| Young person aged 15-24 years | 697 (20.0)      | 139 (21.9)              | 126 (21.3)              | 106 (20.9)             | 89 (17.4)                 | 128 (20.9)               | 109 (17.3)               |
| <b>Age (years) °</b>          |                 |                         |                         |                        |                           |                          |                          |
| 15 – 24                       | 761 (21.8)      | 144 (22.7)              | 140 (23.6)              | 129 (25.5)             | 102 (19.9)                | 134 (21.9)               | 112 (17.8)               |
| 25 – 34                       | 878 (25.2)      | 149 (23.5)              | 137 (23.1)              | 158 (31.2)             | 173 (33.9)                | 128 (20.9)               | 133 (21.1)               |
| 35 – 44                       | 715 (20.5)      | 126 (19.9)              | 118 (19.9)              | 78 (15.4)              | 115 (22.5)                | 132 (21.6)               | 146 (23.2)               |
| 45 – 59                       | 686 (19.7)      | 127 (20.0)              | 115 (19.4)              | 85 (16.8)              | 79 (15.5)                 | 108 (17.6)               | 172 (27.4)               |
| 60 and above                  | 445 (12.8)      | 88 (13.9)               | 83 (14.0)               | 56 (11.1)              | 42 (8.2)                  | 110 (18.0)               | 66 (10.5)                |
| <b>Sex</b>                    |                 |                         |                         |                        |                           |                          |                          |
| Female                        | 2106 (60.4)     | 349 (55.1)              | 344 (58.0)              | 300 (59.3)             | 392 (76.7)                | 376 (61.4)               | 345 (54.8)               |
| Male                          | 1379 (39.6)     | 285 (44.9)              | 249 (42.0)              | 206 (40.7)             | 119 (23.3)                | 236 (38.6)               | 284 (45.2)               |
| <b>Education level ¥</b>      |                 |                         |                         |                        |                           |                          |                          |
| No formal education           | 640 (18.4)      | 77 (12.2)               | 124 (21.0)              | 85 (16.8)              | 28 (5.5)                  | 204 (33.4)               | 122 (19.4)               |
| Primary                       | 1747 (50.2)     | 339 (53.6)              | 311 (52.5)              | 317 (62.6)             | 164 (32.2)                | 324 (53.0)               | 292 (46.4)               |
| Secondary and higher          | 1093 (31.4)     | 216 (34.2)              | 157 (26.5)              | 104 (20.6)             | 318 (62.3)                | 83 (13.6)                | 215 (34.2)               |
| <b>Occupation ‡</b>           |                 |                         |                         |                        |                           |                          |                          |
| Agriculture                   | 1504 (43.2)     | 272 (43.0)              | 298 (50.5)              | 164 (32.5)             | 27 (5.3)                  | 398 (65.0)               | 345 (54.8)               |
| Service and sales             | 572 (16.4)      | 116 (18.4)              | 49 (8.3)                | 86 (17.0)              | 153 (29.9)                | 42 (6.9)                 | 126 (20.0)               |
| Elementary occupations        | 253 (7.3)       | 38 (6.0)                | 12 (2.0)                | 132 (26.1)             | 51 (10.0)                 | 7 (1.1)                  | 13 (2.1)                 |
| Professional job              | 201 (5.8)       | 28 (4.4)                | 19 (3.2)                | 14 (2.8)               | 85 (16.6)                 | 14 (2.3)                 | 41 (6.5)                 |
| Casual labour                 | 24 (0.7)        | 2 (0.3)                 | 4 (0.7)                 | 5 (1.0)                | 8 (1.6)                   | 2 (0.3)                  | 3 (0.5)                  |
| Unemployed †                  | 925 (26.6)      | 176 (27.9)              | 208 (35.3)              | 104 (20.6)             | 187 (36.6)                | 149 (24.4)               | 101 (16.1)               |

Response rate: Overall 91%, Low-risk districts 92%, High-risk districts 89%

° Age categorized as per the 2016 Uganda Demographic and Health Survey.

¥ Missing values: Education (n=5, <1%), Occupation (n=6, <1%), Religion (n=2, <1%)

‡ Occupation categories derived from the 2016 Uganda Demographic and Health Survey

† Unemployed mostly included students = 97 (10.5%)

§ Christians include grouped response categories for Anglicans, Catholics, Pentecostals and Seventh day Adventists

\* Except from education level characteristic (as indicated), all other characteristics had no missing data.

§ Christians include: Anglicans, Catholics, Pentecostals and Seventh day Adventists

**Table S2. Exposure to Ebola-related messages and perceptions of information gap—Uganda, 2020**

|                                                                                                       | All districts<br>N = 3,485<br>% (95% CI) | Low-risk districts      |                         | High-risk districts    |                           |                          |                          |
|-------------------------------------------------------------------------------------------------------|------------------------------------------|-------------------------|-------------------------|------------------------|---------------------------|--------------------------|--------------------------|
|                                                                                                       |                                          | Busia<br>N=634<br>n (%) | Lamwo<br>N=593<br>n (%) | Arua<br>N=506<br>n (%) | Kampala<br>N=511<br>n (%) | Kisoro<br>N=612<br>n (%) | Kasese<br>N=629<br>n (%) |
| <b>Awareness of EVD</b>                                                                               |                                          |                         |                         |                        |                           |                          |                          |
| Aware of EVD outbreak in DRC                                                                          | 47.1 (43.2, 51.0)                        | 41.3 (33.8, 49.3)       | 29.8 (24.2, 36.1)       | 62.4 (52.5,71.4)       | 32.4 (25.9,39.6)          | 90.6 (80.4,95.7)         | 75.5 (68.3,81.5)         |
| <b>Perceived risk of contracting EVD <sup>*,€</sup></b>                                               |                                          |                         |                         |                        |                           |                          |                          |
| No risk                                                                                               | 48.6 (44.2, 52.9)                        | 43.4 (36.6,50.5)        | 52.2 (44.8,59.5)        | 76.7 (65.7,85.0)       | 45.4 (37.5,53.4)          | 44.9 (37.9,52.0)         | 39.6 (34.5,45.0)         |
| Small risk                                                                                            | 23.2 (20.9, 25.7)                        | 23.4 (18.3,29.3)        | 35.1 (28.1,42.7)        | 11.7 (7.2,18.3)        | 27.2 (23.3,31.5)          | 23.9 (18.5,30.4)         | 14.1 (10.2,19.2)         |
| Moderate risk                                                                                         | 8.9 (7.6, 10.5)                          | 24.1 (18.4,30.9)        | 9.3 (5.3,15.9)          | 4.8 (2.8,8.3)          | 5.5 (4.0,7.6)             | 9.1 (6.1,13.5)           | 12.8 (8.6,18.8)          |
| High risk                                                                                             | 19.3 (16.4, 22.6)                        | 9.1 (5.7,14.2)          | 3.4 (1.5,7.4)           | 6.8 (3.6,12.4)         | 21.9 (16.7,28.3)          | 22.1 (12.8,35.2)         | 33.4 (29.2,37.9)         |
| <b>Ebola messages received in past 6 months <sup>*</sup></b>                                          |                                          |                         |                         |                        |                           |                          |                          |
| Did not receive any Ebola messages                                                                    | 50.0 (48.0, 51.9)                        | 70.6 (64.1,76.4)        | 71.0 (63.9,77.2)        | 26.4 (20.9,32.7)       | 65.5 (62.4,68.5)          | 10.7 (8.0,14.2)          | 3.7 (1.8,7.4)            |
| Hand washing                                                                                          | 34.0 (31.0, 37.2)                        | 17.3 (11.7,24.8)        | 10.7 (7.5,15.1)         | 45.6 (37.4,54.1)       | 19.5 (14.9,25.2)          | 67.5 (62.9,71.7)         | 80.3 (72.2,86.6)         |
| Avoid physical contact with people                                                                    | 31.7 (28.5, 35.1)                        | 12.2 (8.7,16.8)         | 19.7 (15.2,25.1)        | 37.8 (30.7,45.4)       | 28.1 (22.7,34.3)          | 51.1 (44.0,58.1)         | 49.3 (41.9,56.6)         |
| Avoid participating in funeral practices and traditional burials that involve contact with the corpse | 18.3 (16.0, 20.8)                        | 4.7 (3.1,7.0)           | 13.3 (9.1,19.0)         | 25.7 (20.5,31.7)       | 17.7 (14.0,22.1)          | 34.9 (24.4,47.1)         | 18.1 (13.3,24.1)         |
| Report sick people to health authorities                                                              | 15.6 (13.8, 17.6)                        | 9.2 (5.8,14.4)          | 7.7 (4.9,11.7)          | 12.5 (8.9,17.2)        | 14.1 (11.2,17.6)          | 29.0 (24.8,33.7)         | 24.9 (20.7,29.6)         |
| Report deaths that resemble Ebola to health authorities                                               | 13.9 (12.2, 15.7)                        | 3.0 (1.7,5.2)           | 11.7 (7.7,17.5)         | 16.9 (11.0,25.1)       | 13.7 (11.1,16.8)          | 17.7 (14.3,21.6)         | 19.0 (16.0,22.3)         |
| Avoid eating bush meat                                                                                | 12.8 (10.4, 15.7)                        | 0.8 (0.3,2.1)           | 0.3 (0.1,1.0)           | 12.8 (9.0,18.1)        | 9.4 (5.4,15.8)            | 20.3 (15.8,25.7)         | 35.0 (30.5,39.7)         |
| Avoid overcrowded places                                                                              | 1.0 (0.6, 1.6)                           | 0                       | 0.2 (<0.1,1.3)          | 3.8 (2.0,7.2)          | 0.4 (0.1,1.7)             | 0.5 (0.2,1.5)            | 2.0 (1.0,4.0)            |
| <b>Reported source of EVD information<sup>*,§</sup></b>                                               |                                          |                         |                         |                        |                           |                          |                          |
| Radio                                                                                                 | 65.2 (60.8, 69.3)                        | 63.2 (48.7,75.6)        | 80.1 (69.3,87.8)        | 74.1 (64.9,81.6)       | 55.3 (48.0,62.3)          | 77.6 (66.2,85.9)         | 74.6 (68.3,80.1)         |
| Television                                                                                            | 35.3 (30.8, 40.1)                        | 16.5 (8.1,30.8)         | 0.7 (0.2,2.9)           | 3.7 (1.9,6.8)          | 63.1 (54.1,71.3)          | 3.0 (1.8,5.2)            | 7.0 (5.0,9.7)            |
| Church or mosque                                                                                      | 27.5 (20.2,36.2)                         | 4.6 (1.8,11.6)          | 10.5 (5.2,20.1)         | 28.7 (18.4,41.8)       | 25.9 (13.4,44.1)          | 25.9 (21.6,30.8)         | 53.2 (47.6,58.7)         |
| Community meetings                                                                                    | 26.3 (20.6, 32.9)                        | 18.1 (11.7,26.9)        | 21.4 (15.4,28.9)        | 26.3 (16.7,38.8)       | 22.6 (13.0,36.3)          | 35.2 (27.7,43.6)         | 39.7 (34.9,44.6)         |
| Household visits                                                                                      | 20.0 (10.9, 34.0)                        | 5.5 (2.8,10.6)          | 9.4 (4.1,20.1)          | 13.2 (9.6,17.9)        | 29.7 (12.3,56.0)          | 11.7 (5.8,22.5)          | 9.9 (6.2,15.6)           |
| Posters or flyers                                                                                     | 10.1 (7.1, 14.3)                         | 0.3 (<0.1,1.8)          | 3.8 (1.4,9.8)           | 16.2 (11.2,23.0)       | 12.5 (7.1,21.1)           | 11.8 (9.0,15.3)          | 4.7 (2.9,7.5)            |
| Newspapers                                                                                            | 8.3 (6.1, 11.3)                          | 6.0 (2.5,13.6)          | 0.6 (0.1,2.7)           | 6.3 (3.6,10.8)         | 12.4 (8.3,18.3)           | 2.1 (1.2,3.6)            | 2.9 (1.6,5.0)            |
| Megaphone public announcements                                                                        | 8.0 (3.3, 18.0)                          | 1.3 (0.3,5.1)           | 2.4 (0.6,9.1)           | 1.8 (0.7,4.3)          | 13.8 (4.9,33.3)           | 0.3 (0.1,1.6)            | 3.3 (1.6,6.7)            |
| Others:                                                                                               |                                          |                         |                         |                        |                           |                          |                          |
| Film vans                                                                                             | 4.6 (1.4,14.5)                           | 0                       | 0                       | 0.6 (0.1,2.8)          | 8.5 (2.2,27.7)            | 2.3 (0.9,5.8)            | 0.9 (0.3,2.8)            |
| Internet or blog or social media                                                                      | 4.5 (3.0,6.8)                            | 0.3 (<0.1,1.9)          | 0.4 (0.1,3.0)           | 1.2 (0.3,4.7)          | 8.3 (5.3,12.8)            | 0.5 (0.1,2.3)            | 1.1 (0.4,2.6)            |
| Mobile phone (text messages or whatsapp)                                                              | 8.9 (4.1,18.4)                           | 3.7 (1.6,8.5)           | 2.4 (0.6,9.1)           | 2.2 (1.0,4.6)          | 14.0 (5.0,33.3)           | 1.2 (0.5,2.9)            | 7.3 (4.8,11.0)           |
| Traditional leaders                                                                                   | 5.2 (2.0,13.0)                           | 0.3 (<0.1,1.9)          | 7.4 (4.0,13.1)          | 1.6 (0.6,4.2)          | 7.2 (1.8,25.1)            | 4.7 (2.8,7.7)            | 4.6 (1.9,10.6)           |
| Ministry of health                                                                                    | 2.3 (1.1,4.7)                            | 1.3 (0.4,4.0)           | 11.1 (6.7,17.9)         | 11.9 (8.3,16.6)        | 12.4 (7.3,20.5)           | 10.0 (7.1,13.9)          | 2.3 (1.1,4.7)            |
| At health facility                                                                                    | 0.9 (0.5,1.7)                            | 0.1 (<0.1,0.8)          | 0                       | 1.6 (0.6,4.6)          | 0.5 (0.1,3.1)             | 4.8 (2.5,8.9)            | 1.0 (0.4,2.1)            |
| From school                                                                                           | 5.4 (3.5,8.2)                            | 3.3 (1.5,6.8)           | 5.8 (2.5,12.7)          | 4.9 (2.8,8.3)          | 6.0 (2.8,12.4)            | 6.8 (4.5,10.0)           | 4.3 (2.9,6.4)            |

**Supplement to:** Musaaazi J, Namageyo-Funa A, Carter VM, et al. Evaluation of community perceptions and prevention practices related to Ebola virus as part of outbreak preparedness in Uganda, 2020. *Glob Health Sci Pract.* 2022;10(3):e2100661. <https://doi.org/10.9745/GHSP-D-21-00661>

|                                                    | All districts<br>N = 3,485<br>% (95% CI) | Low-risk districts      |                        | High-risk districts       |                          |                          |                  |
|----------------------------------------------------|------------------------------------------|-------------------------|------------------------|---------------------------|--------------------------|--------------------------|------------------|
| Busia<br>N=634<br>n (%)                            |                                          | Lamwo<br>N=593<br>n (%) | Arua<br>N=506<br>n (%) | Kampala<br>N=511<br>n (%) | Kisoro<br>N=612<br>n (%) | Kasese<br>N=629<br>n (%) |                  |
|                                                    |                                          |                         |                        |                           |                          |                          |                  |
| Reported EVD information gap <sup>‡‡</sup>         |                                          |                         |                        |                           |                          |                          |                  |
| How EVD is prevented                               | 64.1 (58.6, 69.3)                        | 69.3 (62.7,75.3)        | 77.5 (70.3,83.4)       | 52.9 (41.7,63.7)          | 60.1 (52.7,67.0)         | 74.2 (61.1,84.0)         | 73.5 (43.7,90.9) |
| How EVD is spread                                  | 45.8 (40.1, 51.6)                        | 59.4 (50.7,67.6)        | 63.9 (56.1,71.1)       | 19.4 (12.9,28.3)          | 40.9 (34.3,47.8)         | 68.1 (53.4,79.9)         | 57.3 (28.2,82.1) |
| Signs and symptoms of EVD                          | 40.8 (34.3, 47.7)                        | 61.5 (53.6,68.8)        | 56.9 (50.2,63.4)       | 17.7 (9.5,30.7)           | 37.8 (29.1,47.3)         | 61.0 (47.9,72.7)         | 40.0 (15.3,71.1) |
| Where to go for EVD treatment                      | 29.8 (24.6, 35.7)                        | 36.4 (25.0,49.6)        | 30.3 (25.9,35.1)       | 14.9 (8.2,25.6)           | 32.4 (26.0,39.5)         | 17.2 (6.8,37.1)          | 34.4 (13.7,63.4) |
| How to care for an EVD patient                     | 20.1 (15.1, 26.2)                        | 33.4 (24.0,44.2)        | 21.8 (17.6,26.8)       | 11.6 (6.5,19.8)           | 20.8 (13.1,31.4)         | 8.4 (2.6,23.5)           | 19.8 (6.8,45.6)  |
| Others:                                            |                                          |                         |                        |                           |                          |                          |                  |
| Need information on EVD outbreak in DRC            | 3.6 (1.9,6.6)                            | 2.0 (0.8,4.5)           | 0.9 (0.2,3.8)          | 4.0 (1.7,9.3)             | 2.3 (0.9,5.5)            | 12.7 (4.9,29.0)          | 5.8 (0.6,36.3)   |
| Safe burial of person died of EVD                  | 8.1 (5.4,12.0)                           | 28.2 (18.6,40.4)        | 12.5 (8.3,18.3)        | 5.8 (3.0,11.2)            | 1.7 (0.5,5.7)            | 1.9 (0.4,8.2)            | 18.8 (6.3,44.6)  |
| Monitoring contacts with an EVD patient            | 6.5 (4.1,10.0)                           | 26.3 (16.6,39.0)        | 4.7 (2.7,8.1)          | 1.1 (0.2,8.2)             | 1.3 (0.5,3.9)            | 0.8 (0.1,6.5)            | 17.5 (6.0,41.2)  |
| EVD vaccine safety                                 | 13.2 (9.1,18.9)                          | 28.4 (19.2,39.9)        | 4.9 (2.5,9.2)          | 5.8 (2.9,11.3)            | 9.0 (4.7,16.6)           | 5.8 (2.3,14.0)           | 29.8 (11.2,58.9) |
| EVD vaccine duration of protection                 | 4.7 (2.9,7.4)                            | 25.6 (15.8,38.6)        | 2.5 (1.2,5.2)          | 2.2 (0.8,5.7)             | 0.9 (0.3,3.4)            | 4.6 (1.3,14.9)           | 5.2 (0.6,33.7)   |
| EVD vaccine eligibility                            | 5.9 (4.1,8.3)                            | 28.5 (19.7,39.2)        | 1.5 (0.5,4.7)          | 0                         | 3.0 (1.9,4.8)            | 4.1 (1.2,13.7)           | 6.5 (1.1,29.5)   |
| EVD survivors’ transmission through casual contact | 3.2 (2.1,4.9)                            | 25.4 (15.2,39.1)        | 1.5 (0.6,3.4)          | 2.1 (0.5,8.3)             | 0.3 (0.1,1.7)            | 0                        | 0                |
| EVD survivors’ transmission through sexual contact | 4.0 (2.3,6.8)                            | 24.1 (14.3,37.8)        | 1.6 (0.6,4.3)          | 1.1 (0.2,8.2)             | 0                        | 0                        | 8.0 (1.7,30.7)   |

EVD: Ebola virus disease; DRC: Democratic Republic of Congo

¶ Design based F-statistic p values for comparing high risk versus low risk districts.

¥ Missing values: Perceived risk of contracting EVD (n=51, 1%), preventive Ebola messages received (n=113, 3%), source of EVD information (n=44, 2%), EVD information gap (n= 2,130, 61%)

€ Don't know responses excluded from the risk perception item (n=828, 24%)

‡ Denominator was number of participants who reported ever received preventive EVD messages

**Table S3. Ebola-related knowledge, attitudes, intentions, and self-reported behaviors—Uganda, 2020**

|                                                                       | All districts<br>N = 3,485<br>% (95%CI) | Low-risk districts      |                         | High-risk districts    |                           |                          |                          |
|-----------------------------------------------------------------------|-----------------------------------------|-------------------------|-------------------------|------------------------|---------------------------|--------------------------|--------------------------|
|                                                                       |                                         | Busia<br>N=634<br>n (%) | Lamwo<br>N=593<br>n (%) | Arua<br>N=506<br>n (%) | Kampala<br>N=511<br>n (%) | Kisoro<br>N=612<br>n (%) | Kasese<br>N=629<br>n (%) |
| <b>Knowledge of key EVD signs /symptoms <sup>‡</sup></b>              |                                         |                         |                         |                        |                           |                          |                          |
| Vomiting                                                              | 51.0 (47.9, 54.1)                       | 56.2 (49.0,63.3)        | 60.1 (52.8,67.0)        | 47.0 (37.0,57.0)       | 53.2 (48.6,57.7)          | 48.6 (40.0,57.2)         | 40.5 (31.5,50.2)         |
| Diarrhea                                                              | 50.4 (45.0, 55.7)                       | 53.4 (46.2,60.5)        | 44.6 (36.0,53.7)        | 43.7 (32.1,56.0)       | 55.9 (45.9,65.4)          | 46.4 (37.9,55.1)         | 38.9 (32.3,46.0)         |
| Fever                                                                 | 43.6 (40.3, 46.9)                       | 28.3 (21.7,35.8)        | 34.5 (29.0,40.5)        | 46.4 (37.6,55.6)       | 43.1 (37.4,49.0)          | 45.0 (38.6,51.5)         | 56.9 (51.8,61.8)         |
| Severe headache                                                       | 21.5 (19.5, 23.6)                       | 19.6 (14.1,26.6)        | 29.1 (24.1,34.6)        | 42.9 (34.5,51.6)       | 11.6 (9.4,14.3)           | 30.5 (24.8,36.8)         | 31.6 (25.6,38.3)         |
| <i>Knowledge of all four above signs/symptoms</i>                     | 4.8 (3.4, 6.7)                          | 3.4 (1.4,8.2)           | 7.8 5.1,11.8)           | 14.9 (7.6,27.3)        | 1.3 (0.3,4.6)             | 6.8 (4.6,10.0)           | 7.1 (3.8,12.9)           |
| <i>Others symptoms:</i>                                               |                                         |                         |                         |                        |                           |                          |                          |
| Bleeding (internal/external)                                          | 46.9 (44.8,48.9)                        | 31.4 (24.7,39.0)        | 50.7 (45.5,56.0)        | 65.3 (59.8,70.4)       | 32.8 (30.0,35.7)          | 78.8 (75.3,82.0)         | 74.7 (66.5,81.4)         |
| Weakness                                                              | 13.0 (10.7,15.5)                        | 10.9 (7.9,14.9)         | 14.9 (11.9,18.4)        | 14.0 (10.5,18.4)       | 12.6 (8.8,17.6)           | 13.2 (10.3,16.9)         | 13.8 (10.2,18.4)         |
| Abdominal pain                                                        | 6.4 (4.3,9.5)                           | 7.3 (4.8,11.1)          | 7.9 (5.6,10.9)          | 10.3 (5.9,17.3)        | 4.0 (1.2,12.6)            | 11.8 (9.1,15.1)          | 7.7 (5.9,9.9)            |
| Muscle pain                                                           | 4.8 (3.8,6.1)                           | 4.6 (2.4, 8.5)          | 5.3 (3.8,7.3)           | 4.1 (1.7,10.0)         | 3.5 (2.1,5.6)             | 9.1 (6.5,12.7)           | 8.0 (5.1,12.5)           |
| Sore throat                                                           | 2.9 (2.2,4.0)                           | 2.2 (1.2,3.9)           | 2.7 (1.5,4.8)           | 2.5 (1.0,6.4)          | 3.2 (2.0,5.1)             | 2.0 (0.6,6.2)            | 3.4 (2.0,5.8)            |
| Rash                                                                  | 2.8 (1.7,4.6)                           | 1.8 (1.0,3.1)           | 2.1 (1.1,4.0)           | 4.5 (2.5,7.9)          | 2.9 (1.1,7.1)             | 1.4 (0.8,2.6)            | 2.6 (1.1,5.8)            |
| Lack of appetite                                                      | 2.7 (2.1,3.4)                           | 2.3 (1.2,4.5)           | 6.1 (4.2,8.8)           | 4.8 (2.8,8.3)          | 1.4 (0.8,2.4)             | 3.6 (2.2,5.7)            | 3.6 (2.3,5.8)            |
| Difficulty breathing                                                  | 2.2 (1.5,3.1)                           | 4.0 (2.4,6.5)           | 2.5 (1.3,4.9)           | 2.0 (0.9,4.4)          | 1.1 (0.4,3.4)             | 1.1 (0.5,2.3)            | 5.0 (3.5,7.0)            |
| <b>Knowledge of EVD prevention and treatment</b>                      |                                         |                         |                         |                        |                           |                          |                          |
| Early medical care increases chance of survival <sup>‡</sup>          | 85.4 (83.3, 87.2)                       | 80.6 (76.7,83.9)        | 79.6 (74.4,83.9)        | 84.3 (81.7,86.7)       | 86.4 (82.6,89.5)          | 78.3 (74.4,81.8)         | 91.9 (85.5,95.6)         |
| Early medical care reduces household transmission <sup>‡</sup>        | 82.2 (79.3, 84.9)                       | 81.1 (76.4,85.1)        | 73.8 (69.3,77.9)        | 79.7 (74.8,83.8)       | 81.6 (75.8,86.3)          | 87.1 (83.2,90.2)         | 88.6 (82.2,92.9)         |
| Preventable by avoiding contact with infected corpse <sup>‡</sup>     | 76.8 (74.0, 79.4)                       | 65.8 (57.7,73.1)        | 73.9 (68.6,78.6)        | 71.6 (65.8,76.8)       | 79.0 (73.9,83.3)          | 85.8 (81.5,89.3)         | 78.7 (74.7,82.1)         |
| <i>Knowledge of all three EVD knowledge measures <sup>‡</sup></i>     | 63.0 (60.1, 65.8)                       | 55.1 (47.1,62.9)        | 53.8 (48.5,59.0)        | 57.4 (49.0,65.3)       | 64.8 (60.1,69.3)          | 67.9 (62.8,72.6)         | 68.7 (61.8,74.8)         |
| <b>Misconceptions of EVD</b>                                          |                                         |                         |                         |                        |                           |                          |                          |
| EVD is transmissible by air <sup>‡</sup>                              | 22.2 (19.6, 25.0)                       | 42.5 (32.4,53.3)        | 42.9 (38.4,47.6)        | 21.7 (16.0,28.7)       | 21.7 (17.6,26.5)          | 12.4 (7.8,19.1)          | 5.6 (3.4,9.0)            |
| Spiritual healers can successfully treat EVD <sup>‡</sup>             | 9.7 (7.9, 11.8)                         | 7.5 (4.6,11.8)          | 8.2 (5.4,12.1)          | 4.5 (2.8,7.3)          | 13.2 (10.0,17.2)          | 2.8 (1.8,4.3)            | 7.5 (4.6,12.0)           |
| Traditional healers can successfully treat EVD <sup>‡</sup>           | 2.9 (2.3, 3.7)                          | 6.0 (3.4,10.2)          | 2.5 (1.3,4.5)           | 2.6 (1.4,4.7)          | 2.3 (1.5,3.4)             | 1.9 (1.0,3.6)            | 3.9 (2.2,6.7)            |
| <i>Rejection of all three EVD misconception measures</i>              | 70.4 (67.6, 73.0)                       | 60.0 (51.7,67.7)        | 50.3 (45.4,55.3)        | 69.7 (63.4,75.3)       | 71.7 (66.8,76.2)          | 77.0 (70.3,82.6)         | 78.9 (74.2,82.9)         |
| <b>Comprehensive knowledge</b>                                        | 45.4 (41.8,49.2)                        | 34.2 (25.7,43.8)        | 28.4 (22.9,34.5)        | 40.7 (31.3,50.9)       | 46.6 (40.3,53.0)          | 57.1 (51.5,62.6)         | 55.1 (48.8,61.3)         |
| <b>Attitudes toward EVD survivors</b>                                 |                                         |                         |                         |                        |                           |                          |                          |
| Would welcome back survivor into the community <sup>‡</sup>           | 61.8 (58.4, 65.2)                       | 50.2 (42.8,57.5)        | 70.3 (65.2,75.0)        | 72.9 (62.9,81.0)       | 59.6 (53.8,65.3)          | 47.2 (40.8,53.7)         | 72.0 (65.3,77.8)         |
| Ebola survivor student does not put class at risk of EVD <sup>‡</sup> | 56.4 (52.0, 60.6)                       | 50.8 (44.7,56.8)        | 39.6 (34.2,45.4)        | 56.3 (50.9,61.5)       | 61.7 (53.3,69.6)          | 53.2 (46.1,60.2)         | 50.3 (44.9,55.7)         |

**Supplement to:** Musaaazi J, Namageyo-Funa A, Carter VM, et al. Evaluation of community perceptions and prevention practices related to Ebola virus as part of outbreak preparedness in Uganda, 2020. *Glob Health Sci Pract.* 2022;10(3):e2100661. <https://doi.org/10.9745/GHSP-D-21-00661>

|                                                                        | All districts<br>N = 3,485<br>% (95%CI) | Low-risk districts      |                         | High-risk districts    |                           |                          |                          |
|------------------------------------------------------------------------|-----------------------------------------|-------------------------|-------------------------|------------------------|---------------------------|--------------------------|--------------------------|
|                                                                        |                                         | Busia<br>N=634<br>n (%) | Lamwo<br>N=593<br>n (%) | Arua<br>N=506<br>n (%) | Kampala<br>N=511<br>n (%) | Kisoro<br>N=612<br>n (%) | Kasese<br>N=629<br>n (%) |
| Would buy fresh vegetables from survivor shopkeeper<br>¥               | 47.3 (43.8, 50.9)                       | 40.8 (34.0,48.0)        | 67.0 (62.0,71.6)        | 58.5 (50.6,65.9)       | 47.1 (41.2,53.1)          | 18.6 (13.1,25.6)         | 48.8 (39.2,58.6)         |
| <b>Attitudes toward safe burial practices</b>                          |                                         |                         |                         |                        |                           |                          |                          |
| Accept safe alternatives to traditional burial rituals                 | 80.6 (77.1, 83.6)                       | 84.5 (78.9,88.8)        | 78.1 (69.6,84.8)        | 81.7 (59.6,93.1)       | 76.8 (71.8,81.2)          | 83.5 (77.0,83.4)         | 86.1 (79.4,90.8)         |
| <b>Intention if family member is suspected of EVD ¥</b>                |                                         |                         |                         |                        |                           |                          |                          |
| Take the family member to a health facility                            | 52.4 (46.3, 58.5)                       | 67.3 (59.5,74.2)        | 59.4 (48.5,69.4)        | 46.5 (32.2,61.4)       | 51.5 (40.3,62.5)          | 42.6 (37.0,48.4)         | 51.4 (45.2,57.6)         |
| Report to district health authorities                                  | 43.3 (38.8, 48.0)                       | 29.2 (24.2,34.9)        | 57.5 (51.7,63.1)        | 48.9 (40.6,57.2)       | 42.8 (34.4,51.5)          | 60.9 (53.7,67.7)         | 37.2 (31.5,43.3)         |
| Avoid all physical contact                                             | 10.3 (7.8, 13.6)                        | 4.0 (2.4,6.6)           | 15.4 (10.6,21.9)        | 13.4 (9.8,18.2)        | 8.4 (4.2,16.0)            | 11.6 (8.7,15.4)          | 16.5 (13.8,19.6)         |
| Do nothing                                                             | 5.2 (3.8, 6.9)                          | 12.2 (8.3,17.6)         | 4.8 (2.5,8.8)           | 10.0 (3.7,24.0)        | 2.5 (1.7,3.8)             | 5.6 (3.4,9.0)            | 5.1 (2.1,11.9)           |
| Help care for the family member at home                                | 2.6 (1.7,4.0)                           | 2.9 (1.2,6.9)           | 9.2 (6.3,13.2)          | 3.4 (1.9,6.1)          | 1.7 (0.5,5.6)             | 0.7 (0.3,1.6)            | 3.3 (1.8,5.9)            |
| Check person's temperature                                             | 1.5 (0.7,3.2)                           | 0.5 (0.1,2.1)           | 1.5 (0.6,3.4)           | 0.2 (<0.1,1.4)         | 2.1 (0.8,5.4)             | 0.5 (0.1,2.0)            | 2.0 (0.3,12.3)           |
| Hide the EVD suspected family member                                   | <0.1 (<0.1, 0.1)                        | 0                       | 0.4 (0.1,1.4)           | 0                      | 0                         | 0                        | 0.1 (<0.1,0.7)           |
| <b>Self-reported participation in recent funeral or burial</b>         |                                         |                         |                         |                        |                           |                          |                          |
| Self-reported participation in a funeral/burial in past month          | 39.3 (35.7, 43.0)                       | 47.6 (40.4,54.8)        | 29.8 (21.6,39.7)        | 58.8 (45.3,71.2)       | 24.3 (19.0,30.4)          | 49.0 (35.8,62.3)         | 67.9 (60.8,74.1)         |
| Religious leader prayed for the deceased <sup>¶</sup>                  | 84.9 (78.7, 89.5)                       | 91.9 (87.1,95.0)        | 88.1 (80.4,93.0)        | 90.2 (82.0,94.9)       | 79.9 (67.4,88.4)          | 86.9 (78.8,92.3)         | 90.3 (85.7,93.5)         |
| Family members observed burial from a distance <sup>¶</sup>            | 6.2 (3.8, 9.9)                          | 13.8 (7.8,23.3)         | 3.1 (1.5,6.4)           | 2.6 (1.1,6.4)          | 5.5 (2.0,13.8)            | 0.8 (0.2,2.8)            | 9.8 (4.9,18.7)           |
| Attendees performed rituals involving contact with corpse <sup>¶</sup> | 25.5 (17.4, 35.8)                       | 18.5 (11.4,28.5)        | 18.7 (11.3,29.2)        | 20.1 (14.8,26.6)       | 26.4 (12.3,47.9)          | 13.5 (9.4,19.2)          | 40.2 (34.9,45.7)         |
| Attendees touched each other (e.g. hug, handshakes) <sup>¶</sup>       | 50.8 (42.7, 58.8)                       | 66.2 (56.9,74.4)        | 52.1 (41.9,62.2)        | 27.4 (19.4,37.1)       | 51.6 (36.3,66.6)          | 44.7 (37.9,51.6)         | 58.8 (48.3,68.6)         |
| Respondent had physical contact with the corpse <sup>¶</sup>           | 11.1 (8.4, 14.7)                        | 8.1 (4.7,13.7)          | 13.7 (9.5,19.5)         | 19.3 (12.8,28.0)       | 7.7 (3.7,15.1)            | 6.9 (3.8,12.3)           | 19.2 (12.4,28.4)         |
| <b>Self-reported EVD prevention practices<sup>†</sup></b>              |                                         |                         |                         |                        |                           |                          |                          |
| Self-reported one or more Ebola prevention practice                    | 67.3 (63.3, 71.1)                       | 73.0 (61.4,82.2)        | 71.3 (61.5,79.3)        | 84.6 (76.3,90.3)       | 57.4 (50.3,64.2)          | 67.7 (53.8,79.0)         | 80.8 (77.0,84.0)         |
| Wash hands with soap and water more frequently                         | 57.1 (52.0, 62.0)                       | 59.0 (42.9,73.4)        | 53.8 (42.6,64.8)        | 68.4 (54.7,79.5)       | 50.2 (41.8,58.6)          | 59.2 (42.7,73.9)         | 69.8 (64.1,74.7)         |
| Avoid physical contact with suspected Ebola patients                   | 22.9 (19.3, 26.8)                       | 21.6 (13.0,33.8)        | 35.9 (27.7,45.0)        | 25.9 (20.2,32.5)       | 20.6 (14.9,27.7)          | 22.9 (18.0,28.5)         | 23.8 (16.2,33.5)         |
| Avoid burials that involve contact with a corpse                       | 13.3 (10.1, 17.2)                       | 15.1 (9.7,22.7)         | 8.1 (4.1,15.3)          | 20.9 (15.0,28.3)       | 13.1 (7.8,21.3)           | 6.4 (4.0,10.0)           | 11.1 (8.1,15.1)          |
| Reported all three prevention practices                                | 4.0 (2.0, 7.8)                          | 3.2 (1.1,8.9)           | 1.4 (0.5,4.0)           | 5.7 (2.8,11.1)         | 4.5 (1.4,13.7)            | 1.9 (0.8,4.6)            | 3.5 (1.4,8.2)            |
| Other responses:                                                       |                                         |                         |                         |                        |                           |                          |                          |
| Wash my hands with just water more often                               | 63.0 (57.6,68.0)                        | 62.1 (45.3,76.5)        | 59.6 (46.4,71.6)        | 69.3 (55.5,80.4)       | 53.2 (44.0,62.1)          | 82.5 (75.4,87.9)         | 84.3 (80.8,87.2)         |

**Supplement to:** Musaaazi J, Namageyo-Funa A, Carter VM, et al. Evaluation of community perceptions and prevention practices related to Ebola virus as part of outbreak preparedness in Uganda, 2020. *Glob Health Sci Pract.* 2022;10(3):e2100661. <https://doi.org/10.9745/GHSP-D-21-00661>

|                                                    | All districts<br>N = 3,485<br>% (95%CI) | Low-risk districts      |                         | High-risk districts    |                           |                          |                          |
|----------------------------------------------------|-----------------------------------------|-------------------------|-------------------------|------------------------|---------------------------|--------------------------|--------------------------|
|                                                    |                                         | Busia<br>N=634<br>n (%) | Lamwo<br>N=593<br>n (%) | Arua<br>N=506<br>n (%) | Kampala<br>N=511<br>n (%) | Kisoro<br>N=612<br>n (%) | Kasese<br>N=629<br>n (%) |
| Clean my hands with other disinfectants more often | 15.5 (12.2,19.5)                        | 21.7 (14.9,30.4)        | 5.6 (2.4,12.3)          | 9.0 (3.3,22.2)         | 22.1 (16.1,29.6)          | 1.5 (0.6,4.0)            | 4.0 (2.6,6.0)            |
| Try to avoid crowded places                        | 14.0 (9.5,20.3)                         | 7.1 (3.6,13.4)          | 19.6 (12.6,29.0)        | 14.6 (9.2,22.4)        | 11.7 (4.6,26.6)           | 9.4 (6.5,13.6)           | 26.5 (22.3,31.1)         |
| Drink a lot of water / juice                       | 2.0 (1.0,3.7)                           | 1.7 (0.6,4.7)           | 0                       | 4.6 (1.4,14.0)         | 1.7 (0.5,5.7)             | 2.8 (1.3,6.1)            | 1.2 (0.4,3.6)            |
| Drink traditional herbs                            | 0.4 (0.1,1.2)                           | 0.7 (0.1,5.6)           | 0                       | 0.4 (0.1,3.1)          | 0.3 (<0.1,2.8)            | 0.4 (0.1,1.5)            | 0.4 (0.1,2.9)            |
| Take antibiotics (e.g. penicillin, amoxilin)       | 0.2 (<0.1,0.6)                          | 0                       | 0.7 (0.1,4.8)           | 0.2 (<0.1,1.6)         | 0                         | 0                        | 0.7 (0.1,4.0)            |
| Wear gloves                                        | 0.3 (0.1,0.9)                           | 0                       | 0                       | 0.4 (0.1,3.3)          | 0.3 (<0.1,2.3)            | 0                        | 0.6 (0.2,1.7)            |
| Wash with salt and hot water                       | 0.6 (0.2,1.4)                           | 0.8 (0.1,5.6)           | 0.4 (0.1,2.6)           | 1.4 (0.3,6.4)          | 0.3 (<0.1,2.8)            | 0                        | 1.0 (0.3,3.0)            |

¶ Design based F-statistic P values; comparing High risk versus Low risk districts.

¥ Missing values: Knowledge of EVD prevention and treatment (n=66, 2%), Knowledge of EVD signs \symptoms (n=792, 23%), Traditional healers can successfully treat EVD (n=66, 2%), Spiritual healers can successfully treat EVD (n=66, 2%), EVD is transmissible by air (n=518, 15%), Comprehensive knowledge (n= 523, 15%). Would welcome back EVD survivor into the community (n=79, 2%), Would buy fresh vegetables from EVD survivor shopkeeper (n=91, 3%), Ebola survivor student does not put class at risk of EVD (n=92, 3%), Would avoid touching or washing the corpse of a family member (n=48, 1%), Intended practice if family member is suspected of EVD (n=627, 18%), Participated in a funeral/burial in past month (n=30, <1%), Features of the funeral/burial ceremony (n=64, 4%), Respondents had physical contact with corpse at the funeral/burial (n=33, 2%)

† Denominator is number of respondents who reported that they took action to avoid getting EVD.

♀ Denominator is number of respondents who self-reported to have participated in a funeral/burial in past month
